## Polymyxin B dose fractionation

1 Title:

2 Evaluation of Dose Fractionated Polymyxin B on Acute Kidney Injury: A Translational *In Vitro* Model

3

4 Authors:

5 Jiajun Liu<sup>1,2,3</sup>; Gwendolyn M. Pais<sup>1,2,3</sup>; Sean N. Avedissian<sup>4,5</sup>; Annette Gilchrist<sup>1,2,6</sup>; Andrew Lee<sup>6</sup>; Nathaniel J.  
6 Rhodes<sup>1,2,3</sup>; Alan R. Hauser<sup>6</sup>; Marc H. Scheetz<sup>1,2,3</sup>

7

8 <sup>1</sup>Midwestern University, Downers Grove, IL <sup>2</sup>Midwestern University Chicago College of Pharmacy

9 Pharmacometrics Center of Excellence, Downers Grove, IL <sup>3</sup>Northwestern Memorial Hospital, Chicago, IL

10 <sup>4</sup>Antiviral Pharmacology Laboratory, University of Nebraska Medical Center (UNMC) Center for Drug Discovery,

11 UNMC, Omaha, NE <sup>5</sup>University of Nebraska Medical Center, College of Pharmacy, Omaha, NE <sup>6</sup>Northwestern

12 University, Chicago, IL

13

14 Corresponding Author:

15 Marc H. Scheetz, PharmD, MSc; Professor of Pharmacy Practice and Director of Pharmacometrics Center of

16 Excellence; Midwestern University Chicago College of Pharmacy; 555 31<sup>st</sup> Street, Downers Grove, IL 60515, Phone:

17 630-515-6116; Fax: 630-515-6958; Email: mschee@midwestern.edu

18

19 Financial disclosure: None

20 Keywords: polymyxins, polymyxin B, colistin, CMS, pharmacokinetic, toxicodynamic, animal model, acute kidney  
21 injury, biomarker, KIM1

22

23 Acknowledgements: None

24 **Abstract**

25 The polymyxins are last-line defense for highly resistant infections. Nephrotoxicity, however, is a dose-limiting  
26 factor. Yet, approaches to mitigate nephrotoxicity are poorly defined. This study aimed to investigate the impact of  
27 dose fractionated (once, twice and thrice daily) polymyxin B (PB) on acute kidney injury (AKI) in a pre-clinical  
28 model. Secondly, we aimed to describe the pharmacokinetic (PK) profile of PB. Sprague-Dawley rats were  
29 assigned to experimental groups with different dosing intervals but constant total daily exposure (12 mg/kg/day into  
30 single, twice daily, and thrice daily doses) and controls received normal saline subcutaneously over 3 days. Blood  
31 and urine samples were collected, and kidneys were harvested at necropsy. A three-compartment model best  
32 described the data and Bayesian observed vs. predicted concentration demonstrated bias, imprecision, and  $R^2$  of  
33 0.129 mg/L,  $0.729 \text{ mg}^2/\text{L}^2$  and 0.652, respectively. PB exposure (i.e.  $\text{AUC}_{24\text{h}}$ ) were similar across treatment groups  
34 over time ( $p=0.87$ ). As a representative, urinary KIM-1 were elevated on days 1 and 2 for experimental groups  
35 compared to controls, and thrice daily group experienced the most KIM-1 increase [mean increase (95% CI) day 1  
36 from day -1, 4.44 (0.89, 8.00) ng/mL;  $p=0.018$ ] as compared to control [mean increase (95% CI) day 1 from day -1,  
37 0.03 (-0.42, 0.49) ng/mL;  $p=0.99$ ]. Correspondingly, significant histopathological damage was observed with the  
38 same group ( $p=0.013$ ) (controls as a referent). Our findings suggested that fractionating the PB dose thrice daily  
39 resulted in the most injury in a rat model.

40 **Background**

41 The widespread use of broad-spectrum antimicrobial agents has led to an increasing rate of resistant infections, and  
42 Gram-negative pathogens including *Pseudomonas aeruginosa*, *Acinetobacter* spp., and *Enterobacteriaceae* spp. are  
43 particularly problematic (1, 2). The Center for Disease Control and Prevention (CDC) has published a  
44 comprehensive report detailing the top antibiotic resistant threats in the U.S., stating that at least 2.86 million  
45 Americans contract resistant bacterial and fungal infections and at least 35,900 die annually as a result (3). It is  
46 estimated that by 2050, global deaths due to antimicrobial resistance will balloon to 10 million people per year and  
47 become the leading cause of mortality (4). Multiple Gram-negative species are resistant to nearly all available  
48 antibiotics (3), including newer combination agents (5, 6). Although multiple drugs in the antibiotic pipeline are  
49 promising, there is a prudent need to maximize clinical efficacy and safety of currently available agents (7). As a  
50 result of the paucity of active antibiotics for these difficult-to-treat infections, the polymyxins remain last resort  
51 options (8, 9).

52  
53 The polymyxins are a group of polypeptide antibiotics discovered more than 70 years ago, with activity and efficacy  
54 against Gram-negative pathogens (10, 11). Polymyxin use has declined as a result of associated renal and  
55 neurological adverse effects and newer agents with more favorable safety profiles have emerged (12, 13). Thus, the  
56 treatment-limiting adverse effects of the polymyxins such as kidney injury have greatly limited their utility for  
57 patient care (14-16). Contemporary studies utilizing widely accepted dosing regimens have demonstrated that  
58 nephrotoxicity rates range from 21-48% (17-20). The mechanism for which nephrotoxicity develops appears to  
59 involve several processes. First, the drug is selectively reabsorbed by the renal brush border membrane and  
60 accumulates in renal cells, directly exerting cytotoxic effects to the proximal tubule cells (21). Secondly,  
61 accumulation of drug in the kidneys leads to increased membrane permeability and cell lysis, causing acute tubular  
62 necrosis (15, 22). Lastly, oxidative stress may also play a role in the development of nephrotoxicity associated with  
63 polymyxin therapy (16, 23, 24).

64  
65 While the various mechanisms of polymyxin toxicity are being elucidated, dosing strategies that accelerate/diminish  
66 toxicity remain poorly defined. Toxicity thresholds for plasma 24-hour area under the curve (AUC<sub>24h</sub>) of polymyxin  
67 B and colistin have recently been highlighted, yet approaches to minimize nephrotoxicity risk resulted in mixed

## Polymyxin B dose fractionation

68 outcomes (20, 25-29). More specifically, it remains unclear whether dividing the total daily dose of polymyxins into  
69 fractions (e.g. giving twice or thrice daily) can circumvent kidney injury during treatment. In this study, we  
70 examined the impact of dose fractionated systemic polymyxin B on acute kidney injury (AKI) in a pre-clinical,  
71 humanized model with novel urinary biomarkers (30, 31). In addition, we aimed to describe the polymyxin B  
72 pharmacokinetic (PK) profile.

73 **Material and Methods**

74 *Chemical and reagents*

75 Clinical grade Polymyxin B sulfate (PB) (Lot# CD807) for injection (USP) was purchased from X-GEN  
76 Pharmaceuticals (Horseheads, NY, USA). Study drug was reconstituted and diluted with normal saline (NS) for  
77 injection. Unused portions were properly discarded to minimize loss of potency in subsequent experiments (32).  
78 Colistin sulfate (Sigma-Aldrich Chemical Company, Milwaukee, WI, USA) and creatinine-d3 (Cayman Chemicals,  
79 Ann Arbor, MI, USA) were used as internal standards for the LC-MS/MS assay (Agilent Technologies). All  
80 solvents for the LC-MS/MS analysis were of LC-MS/MS grade. Acetonitrile and methanol were purchased from  
81 VWR International (Radnor, PA, USA). Formic acid was obtained from Fisher Scientific (Waltham, MA, USA).  
82 Pooled male Sprague-Dawley rat plasma was used for sample preparation and calibration of standard curves  
83 (BioreclamationIVT, Westbury, NY, USA).

84

85 *Experimental design and animals*

86 Allocation and number of animals for experimental (i.e. PB-treated) and control protocol groups are described in Fig.  
87 1. The experimental arm was further divided into three groups based on dose fractionation design: once daily (QD),  
88 twice daily (BID), and thrice daily (TID). Each experimental group received subcutaneous injections of PB, and  
89 control groups received equal volumes of NS based on the QD protocol. In all, there were four study groups. Total  
90 daily dose of PB was fixed at 12 mg/kg/day (allometrically scaled) for all experimental groups administered  
91 subcutaneously for 72 hours (i.e. 3 PB doses for QD group, 6 for BID group, and 9 for TID group during the 3-day  
92 study period) (33).

93

94 Male Sprague-Dawley rats (n=32, approximately 8 to 10 weeks old; Harlan, Indianapolis, IN, USA) were used.  
95 Animals were housed in a light- and temperature-controlled rooms during acclimation and study periods. Animals  
96 were maintained in plastic cages on a 12-hour light and 12-hour dark cycle. Food and water were freely accessible  
97 at all times except during periods in which sampling catheters (one per animal) were surgically placed prior to  
98 initiation of study protocol. Post-operative pain was monitored according to protocol. Data were analyzed for all  
99 protocol-initiated animals unless terminated early, in which case data were treated as missing.

100

## Polymyxin B dose fractionation

101 This study was conducted at Midwestern University, Downers Grove, IL. The study methods were reviewed and  
102 approved by the Midwestern University Institutional Animal Care and Use Committee (IACUC; protocol 2677). All  
103 animals were cared for and handled in concordance with animal care and use standards and ethical principles.

104

### 105 *Blood and urine sampling*

106 Fig. 2 provides a schematic flow of study design for each study group. Blood samples were obtained via an internal  
107 jugular vein catheter that was surgically cannulated on day 0 after the acclimation period. Animals were under  
108 ketamine (100 mg/kg) and xylazine (10 mg/kg) anesthesia for surgical procedure and were allowed 24-hour  
109 recovery periods prior to initiation of the study protocol (i.e. drug dosing or blood sampling). When not in use,  
110 catheters were locked with heparin solution (100 IU/mL). Blood samples (0.125 mL aliquots) were obtained after  
111 the first dose (day 1) with a staggered sampling design. A maximum of 16 samples per animal were obtained during  
112 a 4-day period (pre-euthanasia) and no more than 8 samples were drawn in a single day. As an example, for QD and  
113 control groups blood samples were drawn at 5, 20, 60, 120, 180, 240, 360, and 480 minutes after the first dose on  
114 day 1. Eight blood samples total were then obtained on days 2 and 3. A terminal sample was also drawn under  
115 terminal anesthesia. Blood sampling schemes for BID and TID groups follow the same protocol (i.e. maximum  
116 number of samples and volume per animal) while the sampling times were adjusted accordingly based on the dosing  
117 intervals. Each sample was replaced with equal volume of NS to maintain euvoemia. Blood samples were  
118 immediately transferred to a disodium EDTA (Sigma-Aldrich Chemical Company, Milwaukee, WI, USA) treated  
119 microcentrifuge tube and centrifuged at 600  $\times g$  for 10 minutes. Plasma supernatant was collected and stored at -  
120 80°C for batch sample analysis. Animals were placed in metabolic cages for urine collection as previously  
121 described (34, 35). In brief, discrete entry times were recorded for initial transfer of animals to the metabolic cages  
122 (catalogue number 650-0350; Nalgene, Rochester, NY) on day -1 (baseline), and urine collections and volume  
123 measurements followed the 24-hour period on days 2, 3 and 4. All urine samples were collected in laboratory-  
124 controlled ambient conditions, and urinary biomarkers were stable throughout as previously described (35). Urine  
125 samples were centrifuged at 500  $\times g$  at 4°C for 10 minutes, and supernatant was stored at -80°C for batch analysis.

126

### 127 *Determination of PB and creatinine concentrations in plasma*

## Polymyxin B dose fractionation

128 For quantification of plasma PB concentration, 40  $\mu$ L plasma sample was combined with 4  $\mu$ L of internal standard  
129 of colistin sulfate at a concentration of 0.1 mg/mL. Protein precipitation was then performed with 456  $\mu$ L of  
130 methanol containing 0.1% formic acid. Following centrifugation for 10 minutes at 16,000  $\times g$  (Eppendorf model:  
131 5424), 100  $\mu$ L supernatant was collected for analysis. Processed samples were injected (injection volume at 2  $\mu$ L)  
132 into an Agilent 1260 infinity binary liquid chromatograph paired with Agilent 6420 triple quadrupole mass  
133 spectrometer (MS). A Poroshell 120 EC-C18 column (100 mm x 3 mm, 2.7  $\mu$ m) was used. The following  
134 quantifier transitions (m/z) for polymyxin B1 (PB1) and colistin A were identified and utilized: 402.2  $\rightarrow$  101.1,  
135 390.6  $\rightarrow$  101.3, respectively. The assay was linear between 0.5 to 40 mg/L ( $R^2=0.997$ ) for PB1 after an applied  
136 weight of 1/x. To quantify plasma creatinine, m/z transitions of 117.09  $\rightarrow$  89.2, 114.1  $\rightarrow$  44.3 were utilized for  
137 creatinine-d3 and creatinine, respectively. After adjusting for endogenous creatinine in pooled blank plasma and 1/x  
138 weighting, the linear range for creatinine assay was between 0.3 and 40 mg/dL ( $R^2=0.999$ ). The coefficient of  
139 variation (CV%) values for PB1 and creatinine assays were below 10% for intra- and inter-day measures. All  
140 samples measuring above the upper limit of quantification underwent serial dilution for analysis.

141

### 142 *Determination of urinary biomarkers of kidney injury*

143 Urine samples were analyzed for creatinine content and urinary biomarkers. Urine aliquots were analyzed in  
144 batches to determine the concentration of KIM-1, IP-10, TIMP-1, CLN and OPN. Urinary biomarkers were assayed  
145 using a microsphere based MAGPIX kit as previously described (35). In brief, urine samples were aliquoted into  
146 96-well black plates supplied with MILLIPLEX® MAP Rat Kidney Toxicity Magnetic Bead Panel 1 (EMD  
147 Millipore Corporation, Charles, MO, USA), prepared and analyzed per manufacturer's recommendations.

148

### 149 *Histopathological examination of renal cell damage*

150 Kidney tissues were harvested following euthanasia. Each animal's kidneys were removed and briefly washed in  
151 cold NS. The left kidney was fixed in 10% formalin for histopathology examination. Histopathological analysis of  
152 kidneys (n=32) was conducted by IDEXX BioAnalytics (Columbia, MO, USA). A validated, ordinal scoring  
153 system was employed to grade pathological lesions as previously described (31, 36, 37). Briefly, a scale of 0  
154 indicates no abnormality while a scale of 5 indicates massive and extensive renal damage. The final histopathology  
155 score for an individual animal was calculated based on the highest score from the anatomical structural segment.

156

157 *PB pharmacokinetic model and exposure determination*

158 To construct the base PK models and generate exposure estimates for each individual animal, the Nonparametric  
159 Adaptive Grid (NPAG) algorithm (38, 39) within the Pmetrics (Version 1.5.2) package (39) for R (6) was utilized.  
160 Multiple models were built and assessed. A three-compartmental structural model of PB disposition accounting for  
161 absorption constant ( $K_a$ ) from injection site to the central compartment ( $V_C$ ) was fitted to all PK data. The PK  
162 model was parameterized with  $K_a$ ,  $V_C$ , intercompartmental transfer rates ( $K_{23}$ ,  $K_{32}$ ) between central and peripheral  
163 ( $V_P$ ) compartments, and total elimination rate constant ( $K_e$ ). Assay error was included in the model using a  
164 polynomial equation in the form of standard deviation (SD) as a function of each observed concentration, Y (i.e. SD  
165 =  $C_0 + C_1 * Y$ ). Observation weighting was performed using lambda (i.e. error =  $SD^2 * \lambda^{0.5}$ ), an additive  
166 variance model to account for extra process noise. Lambda was initially set at 1 with  $C_0$  and  $C_1$  equal to 0.1 and 0.1,  
167 respectively. Comparative model performance was examined by the change in objective function value (OFV)  
168 calculated as differences in -2 log-likelihood (-2LL), with a reduction of 3.84 in OFV corresponding to  $p < 0.05$   
169 based on chi-square distribution with one degree of freedom. Further, the best-fit model was selected based on the  
170 rule of parsimony and the lowest Akaike's information criterion (AIC) scores. Goodness-of-fit of the competing  
171 models were evaluated by regression on observed vs. predicted plots, coefficients of determination, and visual plots  
172 of individual Bayesian predicted concentration-time profiles. Bias was defined as mean weighted prediction error;  
173 imprecision was defined as bias-adjusted mean weighted squared prediction error. Using the final model, PB  
174 exposure indices ( $AUC_{24h}$ ,  $C_{MAX}$ , and  $C_{MIN}$ ) were calculated from individual Bayesian posterior-predicted  
175 concentrations using 'makeNCA' within Pmetrics package across 24-hour intervals (39).

176

177 *Statistical analysis for biomarkers, PK indices and histopathological scoring*

178 Analysis of variance (ANOVA) with Geisser and Greenhouse epsilon hat correction method accounting for subjects,  
179 treatment groups, repeated measures over time or a mixed-effects model (when data were missing) were utilized for  
180 statistical analyses of urinary biomarkers, plasma creatinine, and PK indices between study groups using GraphPad  
181 Prism (version 8.2.1 for Windows, GraphPad Software, La Jolla, CA). Ordinal logistical regressions on  
182 histopathological scores were performed with observed nominal scores treated as dependent variables and control



## Polymyxin B dose fractionation

183 group as the referent category using Stata version 13 (40). All tests were two-tailed with an  $\alpha$  level of 0.05 for  
184 statistical significance.

185 **Results**

186 *Differences between animal cohorts*

187 A total of 32 PB-treated animals contributed PK model data and completed all protocols. All animals weighed  
188 between 291.1 to 321.1 g. Pre-surgery (i.e. day -1) mean (SD) urine volumes were 5.2 (1.7), 8.6 (2.2), 6.4 (2.3), and  
189 5.8 (2.2) mL for QD, BID, TID and control groups, respectively. The QD group had significantly lower urine  
190 volume compared to BID group at day -1 ( $p=0.01$ ), while no statistical differences in urine output were observed  
191 between experimental groups on days 1, 2, and 3 (Fig. 3). All experimental groups produced significantly more  
192 urine compared to controls on study days 1, 2 and 3, except BID group on day 1 ( $p=0.23$ ).

193

194 *PB pharmacokinetic models and exposures*

195 Various modeling approaches were utilized to fit the PK data. A three-compartment model was chosen as the final  
196 model given that it was the most parsimonious with the least bias and imprecision and displayed the most significant  
197 OFV change with the lowest AIC against competing models (Table 1). Table 2 provides a summary of the  
198 population mean parameter values for  $K_a$ ,  $V_C$ ,  $K_{23}$ , and  $K_{32}$ . Model predictive performance for observed vs.  
199 Bayesian posterior-predicted concentrations for bias, imprecision, and  $R^2$  were: 0.129 mg/L, 0.729 mg<sup>2</sup>/L<sup>2</sup> and 0.652,  
200 respectively (Fig. 4). PK exposures were calculated based on NCA analysis on the Bayesian posterior-predicted  
201 concentrations from the best-fit PK model and are graphically represented in Fig. 5. Mean  $AUC_{24h}$  (SD) for QD,  
202 BID, and TID groups were 171.1 (41.0), 168.6 (58.9), and 129.6 (50.7) mg\*h/L, respectively. Similarly, mean (SD)  
203  $C_{MAX}$  for QD, BID, and TID groups were 10.7 (0.80), 9.7 (0.47), and 6.7 (0.49) mg/L, respectively and mean  $C_{MIN}$   
204 (SD) were 2.3 (1.3), 3.7 (1.4), and 3.2 (1.2) mg/L, respectively. Statistical procedures were conducted to evaluate  
205 the differences in  $AUC_{24h}$ ,  $C_{MAX}$  and  $C_{MIN}$  between experimental groups and respective 24-hour intervals. Although  
206 the QD group exhibited higher  $AUC_{24h}$  than TID group ( $p=0.003$ ) on day 1, no significant effects were observed for  
207 overall exposure vs. time ( $p=0.87$ ). Similarly, the QD group had an overall lower mean  $C_{MIN}$  compared to the BID  
208 group ( $p < 0.0001$ ) or TID group ( $p < 0.0001$ ) during the first 24 hours, but no significant differences were observed  
209 between experimental groups over the entire study period ( $p=1.00$ ). Compared to the TID group, both QD and BID  
210 groups showed significantly higher  $C_{MAX}$  during the first 24 hours ( $p=0.0083$  and  $p=0.049$ , respectively). The QD  
211 group exhibited the highest  $C_{MAX}$  on days 2 and 3 ( $p=0.0025$  and  $p=0.0017$ , respectively). On days 2 and 3, the

## Polymyxin B dose fractionation

212  $C_{MAX}$  in the BID group was numerically elevated when compared to the TID group, but the values were not  
213 statistically significant ( $p=0.051$  and  $p=0.055$ , respectively).

214

### 215 *Kidney injury biomarkers and histopathological examinations*

216 Plasma creatinine and urinary biomarkers are graphically represented in Fig. 6. Plasma creatinine did not differ  
217 across treatments over time ( $p=0.18$ ); however, the following biomarkers showed a significant treatment effect over  
218 the study period: KIM-1 ( $p<0.0001$ ), OPN ( $p=0.029$ ), IP-10 ( $p=0.046$ ), and TIMP-1 ( $p<0.0001$ ). As a representative  
219 biomarker, KIM-1 rose rapidly on days 1 and 2 for all experimental groups. Notably, the TID group experienced the  
220 largest KIM-1 increase [mean increase (95% CI) day 1 from day -1, 4.44 (0.89, 8.00) ng/mL;  $p=0.018$ ] as compared  
221 to control [mean increase (95% CI) day 1 from day -1, 0.03 (-0.42, 0.49) ng/mL;  $p=0.99$ ]. Increases were also  
222 observed with QD [mean increase (95% CI) day 1 from day -1, 2.58 (-0.12, 5.27) ng/mL;  $p=0.06$ ] and BID groups  
223 [mean difference (95% CI) day 1 from day -1, 0.84 (-0.05, 1.73) ng/mL;  $p=0.06$ ]. Further, the TID group exhibited  
224 a significant KIM-1 increase on day 2 [mean increase (95% CI), 2.44 (1.22, 3.67) ng/mL;  $p=0.0013$ ] and a  
225 nonsignificant decrease was observed on day 3 [mean decrease (95% CI), 2.39 (-0.053, 4.83) ng/mL;  $p=0.055$ ].  
226 Mean KIM-1 changes did not differ on days 2 and 3 between QD and BID groups. Similar trends and significant  
227 treatment and time effects were also observed for OPN ( $p=0.029$ ), IP-10 ( $p=0.046$ ), and TIMP-1 ( $p<0.0001$ ) but no  
228 significant effects were observed with CLN ( $p=0.093$ ) (Fig. 6).

229

230 Histopathological scorings are summarized in Table 3 and graphically displayed in Supplemental Figure S1.

231 Representative histopathology images are provided in supplemental materials (Figures S2, S3, S4 and S5).

232 Significant histopathological damage was observed with the TID group with a median [range] score of 2 [2, 3.5]  
233 ( $p=0.013$ ; 95% CI, 0.70, 5.88) using controls as a referent category. While damage was also observed with QD  
234 [median score (range), 2 (1, 3)] and BID [2 (1, 3)] groups, no statistically significant difference was found when  
235 comparing either group to the referent group [ $p=0.156$  (95% CI, -0.61, 3.77),  $p=0.092$  (95% CI, -0.34, 4.50),  
236 respectively].

237 **Discussion**

238 A dose fractionation scheme in this study effectively maintained constant exposure and separated maximal  
239 concentrations across experimental groups. Our data demonstrated that fractionating the PB dose into three daily  
240 aliquots resulted in the most kidney injury as measured by the urinary biomarkers: KIM-1, OPN, IP-10, and TIMP-1.  
241 Significant differences were detectable within 24 hours. These markers have previously demonstrated high  
242 sensitivity for kidney injury (41-43). Further, KIM-1 and OPN were directly linked to proximal tubular toxicity, and  
243 this is concordant with previous reports (25, 41). Histopathological findings also indicated that thrice daily dosing  
244 of PB led to the most severe kidney insults within the study period. While the differences in urinary biomarkers and  
245 categorical damage scales were not significant for QD and BID groups, both groups demonstrated less extensive  
246 kidney injuries consistent with results from urinary biomarkers such as elevations in KIM-1 levels. Additionally, we  
247 derived a best-fit PK model for PB in rats using rich PK data. Utilizing the best-fit model, we found that the PB  
248 exposure (i.e.  $AUC_{24h}$ ) derived were similar across all experimental groups (QD, BID, and TID) and separation of  
249 peak concentrations was observed.

250  
251 Contemporary dosing of intravenous PB recommends it be administered in 2 divided doses based on a weight-based  
252 total daily dose (26, 44). It has been suggested that PB-induced kidney injury could be minimized by optimizing  
253 dosing intervals, similar to that observed with aminoglycosides (7, 45). Wallace *et al.* utilized a preclinical rat  
254 model to explore this possibility for colistin. The authors found that the colistin methanesulfonate (CMS, prodrug of  
255 colistin) regimen corresponding to once daily dosing in humans led to a greater number and severity of renal lesions  
256 when compared to the group received fractionated dosage corresponding to twice daily dosing in human. They  
257 concluded that extended interval dosing of CMS resulted in more extensive renal damage (27). Abdelraouf *et al.*  
258 also utilized a rat model and administered PB subcutaneously at 20 mg/kg/day or 5 mg/kg every 6 hours (25). In  
259 contrast, they found a lower rate of nephrotoxicity associated with PB in the once daily group, while the split-dosage  
260 group experienced a quicker onset of nephrotoxicity (defined by elevation of creatinine from baseline); however, the  
261 rate of nephrotoxicity converged between groups towards the end of study. The authors suggested that an increased  
262 active, saturable, carrier-mediated uptake may have been responsible for this effect when PB was given repeatedly  
263 (as opposed to once daily) and led to the higher rate of renal injury. Most recently, Okoduwa *et al.* conducted a  
264 retrospective, propensity-score matched clinical study on 200 patients who received once-daily or twice-daily

## Polymyxin B dose fractionation

265 systemic PB across different medical centers (28). In contrast to the animal study by Abdelraouf *et al.*, they found  
266 that a higher proportion of nephrotoxicity (using clinical criteria and considering all stages of AKI) was observed in  
267 the once-daily group than the twice-daily group (47% vs. 17%, respectively;  $p=0.0005$ ). The findings from  
268 Okoduwa *et al.* are consistent with the animal model employed by Wallace *et al.*, though CMS (and not PB) was  
269 utilized; however, it is unclear whether patients receiving once daily PB in clinical studies actually received  
270 equivalent (or greater) exposures compared to those receiving twice daily dosing. Our findings agree with the  
271 results from Abdelraouf *et al.* that dose fractionated PB strategy led to more extensive AKI. Additionally, our study  
272 provided rich PK data to confirm the exposure status across experimental groups and employed highly sensitive and  
273 specific urinary biomarkers for early detection of AKI in addition to plasma creatinine (46). The level of injury was  
274 further confirmed by histopathological examination.

275  
276 We acknowledge several limitations to our study. First, our study was limited to 72-hour dosing compared to the  
277 relatively longer study period (up to 10 days) by Abdelraouf *et al.* The shorter time frame did not allow us to  
278 observe levels of plasma creatinine nor urinary biomarkers beyond this time frame; however, the urinary biomarkers  
279 utilized are highly sensitive in detecting early stages of AKI and our histopathology examinations confirmed the  
280 injury (30, 31, 46-48). Secondly, PB exposure (i.e.  $AUC_{24h}$ ) was held constant in our study and linking exposure to  
281 toxicodynamic data (i.e. injury biomarkers) would not be ideal as this was not an objective of our study. Thus,  
282 further studies are warranted to examine the PK/PD indices to toxicodynamic outcomes. Thirdly, this is a pre-  
283 clinical model and additional translational studies defining the lower limit of PB toxicity are needed to design  
284 maximally safe and effective dosing regimens.

285  
286 To date, this is the first study that employed a rat model with a rich PK sampling design with dose fractionated  
287 systemic PB that also allowed PK estimates at an individual level. We also demonstrated that TID dosing of PB  
288 induces AKI as early as 24 hours. These findings may have clinical implications for PB dosing schemes in difficult-  
289 to-treat infections while minimizing nephrotoxicity. Further studies are warranted to explore PB exposure linked to  
290 toxicity while maximizing efficacy.

291 References

- 292 (1) Waterer, G.W. & Wunderink, R.G. Increasing threat of Gram-negative bacteria. *Crit Care Med*  
293 **29**, N75-81 (2001).
- 294 (2) Aslam, B. *et al.* Antibiotic resistance: a rundown of a global crisis. *Infect Drug Resist* **11**, 1645-  
295 58 (2018).
- 296 (3) CDC. Antibiotic Resistance Threats in the United States, 2019. Atlanta, GA: U.S. Department of  
297 Health and Human Services, CDC; 2019.
- 298 (4) Resistance, I.C.G.o.A. No Time to Wait: Securing the future from drug-resistant infections.  
299 Report to the Secretary-General of the United Nations. 2019.
- 300 (5) MacVane, S.H., Pandey, R., Steed, L.L., Kreiswirth, B.N. & Chen, L. Emergence of Ceftolozane-  
301 Tazobactam-Resistant *Pseudomonas aeruginosa* during Treatment Is Mediated by a Single AmpC  
302 Structural Mutation. *Antimicrob Agents Chemother* **61**, (2017).
- 303 (6) Shields, R.K., Nguyen, M.H., Press, E.G., Chen, L., Kreiswirth, B.N. & Clancy, C.J. Emergence  
304 of Ceftazidime-Avibactam Resistance and Restoration of Carbapenem Susceptibility in *Klebsiella*  
305 *pneumoniae* Carbapenemase-Producing *K pneumoniae*: A Case Report and Review of Literature.  
306 *Open Forum Infect Dis* **4**, ofx101 (2017).
- 307 (7) Trusts, T.P.C. Antibiotics Currently in Global Clinical Development. (2019).
- 308 (8) Evans, M.E., Feola, D.J. & Rapp, R.P. Polymyxin B sulfate and colistin: old antibiotics for  
309 emerging multiresistant gram-negative bacteria. *Ann Pharmacother* **33**, 960-7 (1999).
- 310 (9) Thomas, T.A. *et al.* High performance liquid chromatography-mass spectrometry assay for  
311 polymyxin B1 and B2 in human plasma. *Ther Drug Monit* **34**, 398-405 (2012).
- 312 (10) Falagas, M.E. & Kasiakou, S.K. Colistin: the revival of polymyxins for the management of  
313 multidrug-resistant gram-negative bacterial infections. *Clin Infect Dis* **40**, 1333-41 (2005).
- 314 (11) Yahav, D., Farbman, L., Leibovici, L. & Paul, M. Colistin: new lessons on an old antibiotic. *Clin*  
315 *Microbiol Infect* **18**, 18-29 (2012).
- 316 (12) Koch-Weser, J., Sidel, V.W., Federman, E.B., Kanarek, P., Finer, D.C. & Eaton, A.E. Adverse  
317 effects of sodium colistimethate. Manifestations and specific reaction rates during 317 courses of  
318 therapy. *Ann Intern Med* **72**, 857-68 (1970).
- 319 (13) Tamma, P.D. *et al.* The use of intravenous colistin among children in the United States: results  
320 from a multicenter, case series. *Pediatr Infect Dis J* **32**, 17-22 (2013).
- 321 (14) Falagas, M.E. & Kasiakou, S.K. Toxicity of polymyxins: a systematic review of the evidence  
322 from old and recent studies. *Crit Care* **10**, R27 (2006).
- 323 (15) Justo, J.A. & Bosso, J.A. Adverse reactions associated with systemic polymyxin therapy.  
324 *Pharmacotherapy* **35**, 28-33 (2015).
- 325 (16) Zavascki, A.P. & Nation, R.L. Nephrotoxicity of Polymyxins: Is There Any Difference between  
326 Colistimethate and Polymyxin B? *Antimicrob Agents Chemother* **61**, (2017).
- 327 (17) Crass, R.L., Rutter, W.C., Burgess, D.R., Martin, C.A. & Burgess, D.S. Nephrotoxicity in  
328 Patients with or without Cystic Fibrosis Treated with Polymyxin B Compared to Colistin.  
329 *Antimicrob Agents Chemother* **61**, (2017).
- 330 (18) Phe, K. *et al.* In vitro assessment and multicenter cohort study of comparative nephrotoxicity  
331 rates associated with colistimethate versus polymyxin B therapy. *Antimicrob Agents Chemother*  
332 **58**, 2740-6 (2014).
- 333 (19) Temocin, F., Erdinc, S., Tulek, N., Demirelli, M., Bulut, C. & Ertem, G. Incidence and Risk  
334 Factors for Colistin-Associated Nephrotoxicity. *Jpn J Infect Dis* **68**, 318-20 (2015).
- 335 (20) Tsuji, B.T. *et al.* International Consensus Guidelines for the Optimal Use of the Polymyxins:  
336 Endorsed by the American College of Clinical Pharmacy (ACCP), European Society of Clinical  
337 Microbiology and Infectious Diseases (ESCMID), Infectious Diseases Society of America  
338 (IDSA), International Society for Anti-infective Pharmacology (ISAP), Society of Critical Care  
339 Medicine (SCCM), and Society of Infectious Diseases Pharmacists (SIDP). *Pharmacotherapy* **39**,  
340 10-39 (2019).

- 341 (21) Suzuki, T., Yamaguchi, H., Ogura, J., Kobayashi, M., Yamada, T. & Iseki, K. Megalin  
342 contributes to kidney accumulation and nephrotoxicity of colistin. *Antimicrob Agents Chemother*  
343 **57**, 6319-24 (2013).
- 344 (22) Kelesidis, T. & Falagas, M.E. The safety of polymyxin antibiotics. *Expert Opin Drug Saf* **14**,  
345 1687-701 (2015).
- 346 (23) Yousef, J.M., Chen, G., Hill, P.A., Nation, R.L. & Li, J. Melatonin attenuates colistin-induced  
347 nephrotoxicity in rats. *Antimicrob Agents Chemother* **55**, 4044-9 (2011).
- 348 (24) Yousef, J.M., Chen, G., Hill, P.A., Nation, R.L. & Li, J. Ascorbic acid protects against the  
349 nephrotoxicity and apoptosis caused by colistin and affects its pharmacokinetics. *J Antimicrob*  
350 *Chemother* **67**, 452-9 (2012).
- 351 (25) Abdelraouf, K., Braggs, K.H., Yin, T., Truong, L.D., Hu, M. & Tam, V.H. Characterization of  
352 polymyxin B-induced nephrotoxicity: implications for dosing regimen design. *Antimicrob Agents*  
353 *Chemother* **56**, 4625-9 (2012).
- 354 (26) Nation, R.L., Rigatto, M.H.P., Falci, D.R. & Zavascki, A.P. Polymyxin Acute Kidney Injury:  
355 Dosing and Other Strategies to Reduce Toxicity. *Antibiotics (Basel)* **8**, (2019).
- 356 (27) Wallace, S.J. *et al.* Subacute toxicity of colistin methanesulfonate in rats: comparison of various  
357 intravenous dosage regimens. *Antimicrob Agents Chemother* **52**, 1159-61 (2008).
- 358 (28) Okoduwa, A. *et al.* Nephrotoxicity Associated with Intravenous Polymyxin B Once- versus  
359 Twice-Daily Dosing Regimen. *Antimicrob Agents Chemother* **62**, (2018).
- 360 (29) Zavascki, A.P. Polymyxins for the treatment of extensively-drug-resistant Gram-negative bacteria:  
361 from pharmacokinetics to bedside. *Expert Rev Anti Infect Ther* **12**, 531-3 (2014).
- 362 (30) O'Donnell, J.N. *et al.* 24-Hour Pharmacokinetic Relationships for Vancomycin and Novel  
363 Urinary Biomarkers of Acute Kidney Injury. *Antimicrob Agents Chemother* **61**, (2017).
- 364 (31) Rhodes, N.J. *et al.* Evaluation of Vancomycin Exposures Associated with Elevations in Novel  
365 Urinary Biomarkers of Acute Kidney Injury in Vancomycin-Treated Rats. *Antimicrob Agents*  
366 *Chemother* **60**, 5742-51 (2016).
- 367 (32) Lim, T.P. *et al.* Physicochemical Stability Study of Polymyxin B in Various Infusion Solutions  
368 for Administration to Critically Ill Patients. *Ann Pharmacother* **50**, 790-2 (2016).
- 369 (33) Sharma, V. & McNeill, J.H. To scale or not to scale: the principles of dose extrapolation. *Br J*  
370 *Pharmacol* **157**, 907-21 (2009).
- 371 (34) Prozialeck, W.C. *et al.* Kidney injury molecule-1 is an early biomarker of cadmium  
372 nephrotoxicity. *Kidney Int* **72**, 985-93 (2007).
- 373 (35) Rhodes, N.J., Liu, J., McLaughlin, M.M., Qi, C. & Scheetz, M.H. Evaluation of clinical outcomes  
374 in patients with Gram-negative bloodstream infections according to cefepime MIC. *Diagn*  
375 *Microbiol Infect Dis* **82**, 165-71 (2015).
- 376 (36) Sistare, F.D. *et al.* Towards consensus practices to qualify safety biomarkers for use in early drug  
377 development. *Nat Biotechnol* **28**, 446-54 (2010).
- 378 (37) Vaidya, V.S. *et al.* Kidney injury molecule-1 outperforms traditional biomarkers of kidney injury  
379 in preclinical biomarker qualification studies. *Nat Biotechnol* **28**, 478-85 (2010).
- 380 (38) Leary, R.J., Roger & Schumitzky, Alan & Van Guilder, M. . An adaptive grid non-parametric  
381 approach to pharmacokinetic and dynamic (PK/PD) population models. *Proceedings of the IEEE*  
382 *Symposium on Computer-Based Medical Systems*, 389-94.
- 383 (39) Neely, M.N., van Guilder, M.G., Yamada, W.M., Schumitzky, A. & Jelliffe, R.W. Accurate  
384 detection of outliers and subpopulations with Pmetrics, a nonparametric and parametric  
385 pharmacometric modeling and simulation package for R. *Ther Drug Monit* **34**, 467-76 (2012).
- 386 (40) StataCorp. 2013. Stata Statistical Software: Release 13. College Station, TX: StataCorp LP.
- 387 (41) Vaidya, V.S., Ferguson, M.A. & Bonventre, J.V. Biomarkers of acute kidney injury. *Annu Rev*  
388 *Pharmacol Toxicol* **48**, 463-93 (2008).
- 389 (42) Musial, K. & Zwolinska, D. Pleiotropic functions of TIMP-1 in patients with chronic kidney  
390 disease. *Cell Mol Life Sci* **71**, 1547-8 (2014).

- 391 (43) Erez, D.L. *et al.* Urinary CXCL10 and CXCL9 Are Associated with Acute Kidney Injury in  
392 Children after Hematopoietic Stem Cell Transplantation: Results of a Discovery and Validation  
393 Cohort. *Biology of Blood and Marrow Transplantation* **25**, S185-S6 (2019).
- 394 (44) Polymyxin B for injection USP [package insert]. Oakville, ON: SteriMax Inc.; 2016.
- 395 (45) Barza, M., Ioannidis, J.P., Cappelleri, J.C. & Lau, J. Single or multiple daily doses of  
396 aminoglycosides: a meta-analysis. *BMJ* **312**, 338-45 (1996).
- 397 (46) Avedissian, S.N. *et al.* Twenty-four hour pharmacokinetic relationships for intravenous  
398 vancomycin and novel urinary biomarkers of acute kidney injury in a rat model. *J Antimicrob*  
399 *Chemother* **74**, 2326-34 (2019).
- 400 (47) Joshi, M.D. *et al.* Evaluation of Fetal and Maternal Vancomycin-Induced Kidney Injury during  
401 Pregnancy in a Rat Model. *Antimicrob Agents Chemother* **63**, (2019).
- 402 (48) Pais, G.M. *et al.* Comparative Performance of Urinary Biomarkers for Vancomycin-Induced  
403 Kidney Injury According to Timeline of Injury. *Antimicrob Agents Chemother* **63**, (2019).

404



1 **Figure 1.**

2

3 **a) Allocation of experimental groups.**

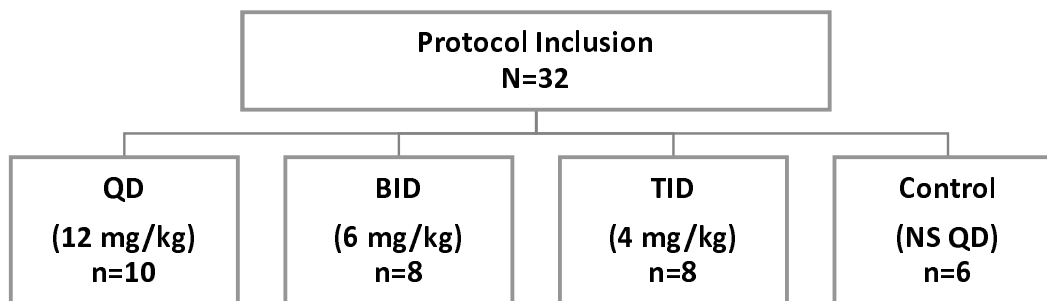

4

5 *QD: once daily; BID: twice daily; TID: thrice daily*

6 *Control: once daily protocol*

7 **Figure 2. Schematic of study design for each study group.**  
8

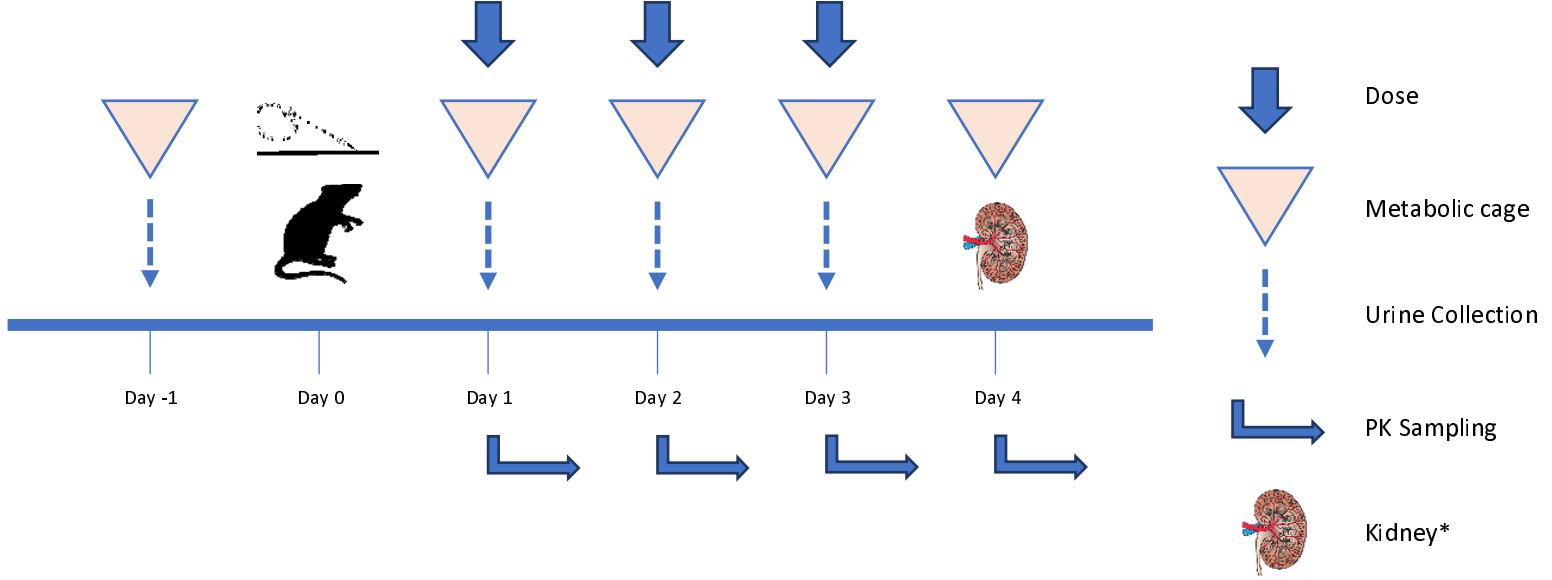

9  
10  
11 *Day 0 depicts surgical cannulation of catheter for blood sampling*  
12 *\*Kidney image from Open Michigan*

13 **Figure 3. Mean 24-h urine volume between experimental and control groups**

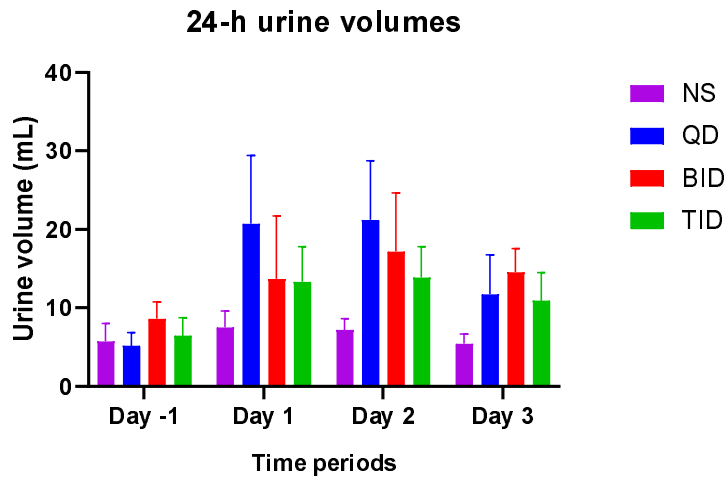

14

- 15 **Figure 4. Goodness-of-fit plot for Bayesian observed vs. predicted plasma PB concentrations utilizing**  
16 **the final three-compartment model.**

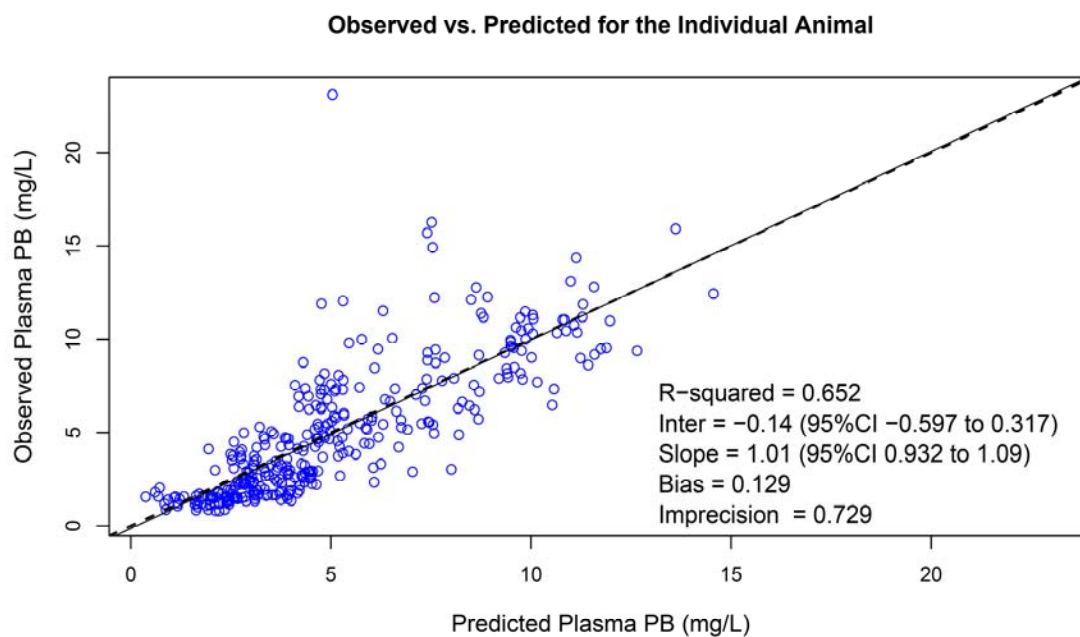

- 17  
18

19 **Figure 5. Violin plots of PK indices from the final best-fit model by days**

20 a) 24-h AUC

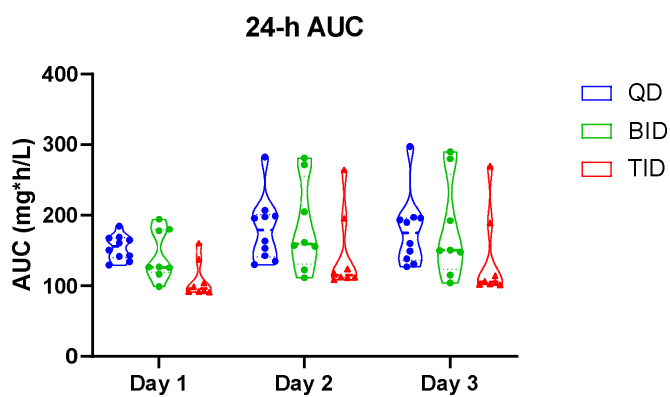

21

22 b) 24-h C<sub>MAX</sub>

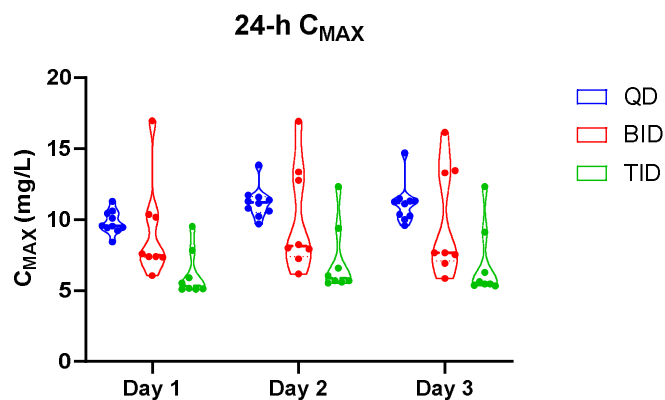

23

24 c) 24-h C<sub>MIN</sub>

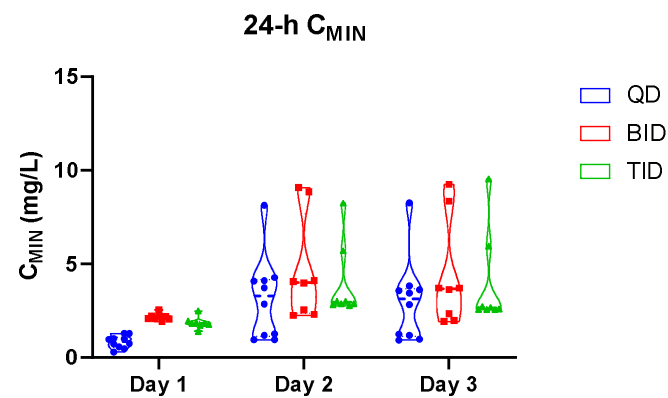

25

26 **Figure 6. Plasma creatinine and urinary biomarkers**

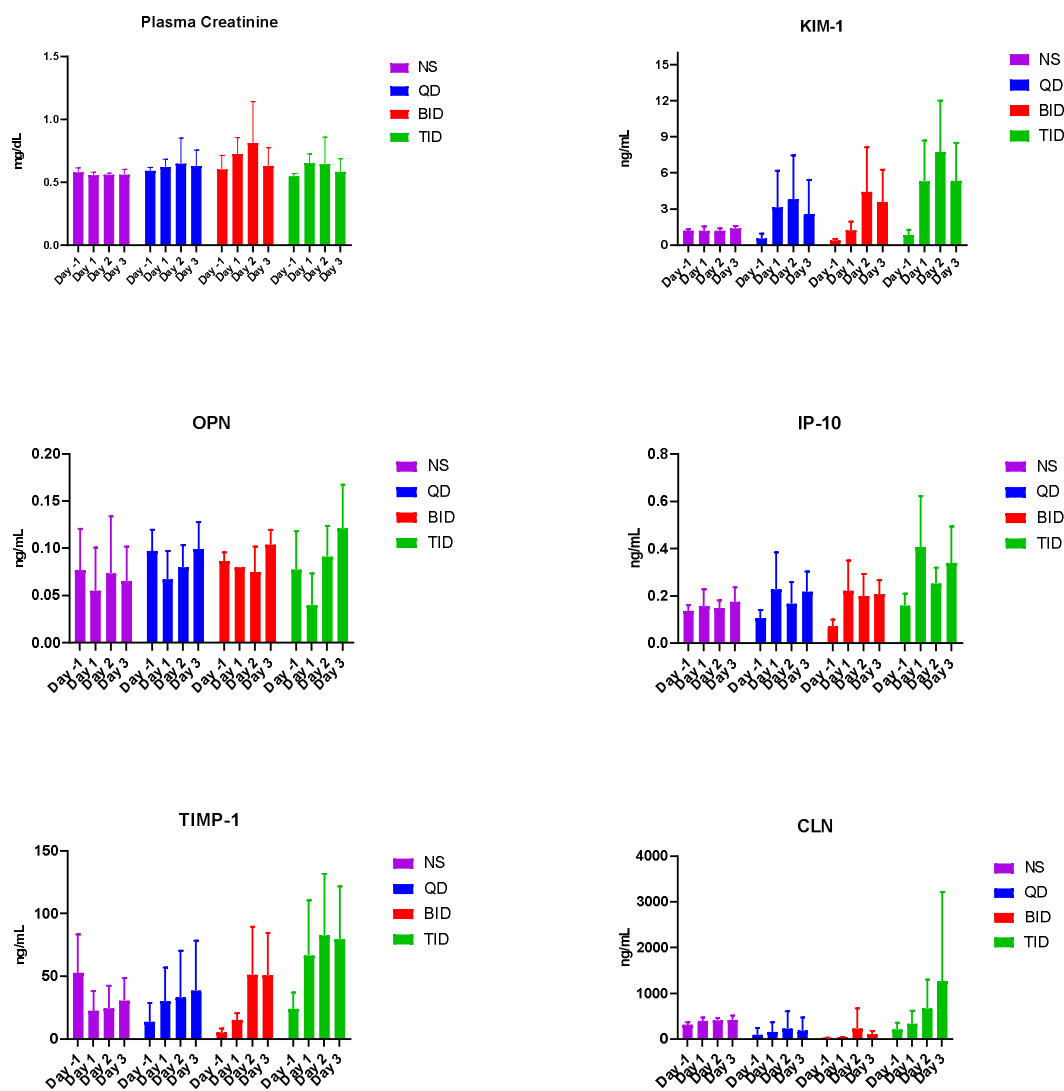

1 **Table 1. Model selection summary**

| <b>Compartmental Models</b> | <b>-2LL</b> | <b>OFV Change</b> | <b>AIC</b> | <b>Bias (mg/L)</b> | <b>Imprecision (mg<sup>2</sup>/L<sup>2</sup>)</b> | <b>Bayesian R<sup>2</sup></b> |
|-----------------------------|-------------|-------------------|------------|--------------------|---------------------------------------------------|-------------------------------|
| <b>One</b>                  | 1709        | Ref               | 1715       | -0.48              | 0.95                                              | 0.10                          |
| <b>Two</b>                  | 1709        | 0                 | 1720       | -0.05              | 0.90                                              | 0.20                          |
| <b>Three</b>                | 1450        | 259               | 1463       | 0.13               | 0.73                                              | 0.65                          |

2 *One-compartment model served as the base model to derive two- and three-compartment models;*

3 *three-compartment model is the final model*

4 **Table 2. Mean population parameters from the final model**

|                       | Mean  | SD     |
|-----------------------|-------|--------|
| $K_a$ ( $h^{-1}$ )    | 0.290 | 0.460  |
| $K_e$ ( $h^{-1}$ )    | 0.411 | 0.076  |
| $V_C$ (L)             | 0.056 | 0.079  |
| $K_{23}$ ( $h^{-1}$ ) | 6.214 | 11.430 |
| $K_{32}$ ( $h^{-1}$ ) | 3.163 | 43.00  |

5



6 **Table 3. Ordinal logistic regression of histopathology scorings by groups**

|         | Median Score [range] | p value  | 95% CI     |
|---------|----------------------|----------|------------|
| Control | 1.5 [1-2]            | Referent | Referent   |
| QD      | 2 [1-3]              | 0.156    | -0.61-3.77 |
| BID     | 2 [1-3]              | 0.092    | -0.34-4.50 |
| TID     | 2 [2-3.5]            | 0.013    | 0.70-5.88  |

7

## **Supplemental Materials**

Figure S1. Violin plot of histopathological scores between all groups

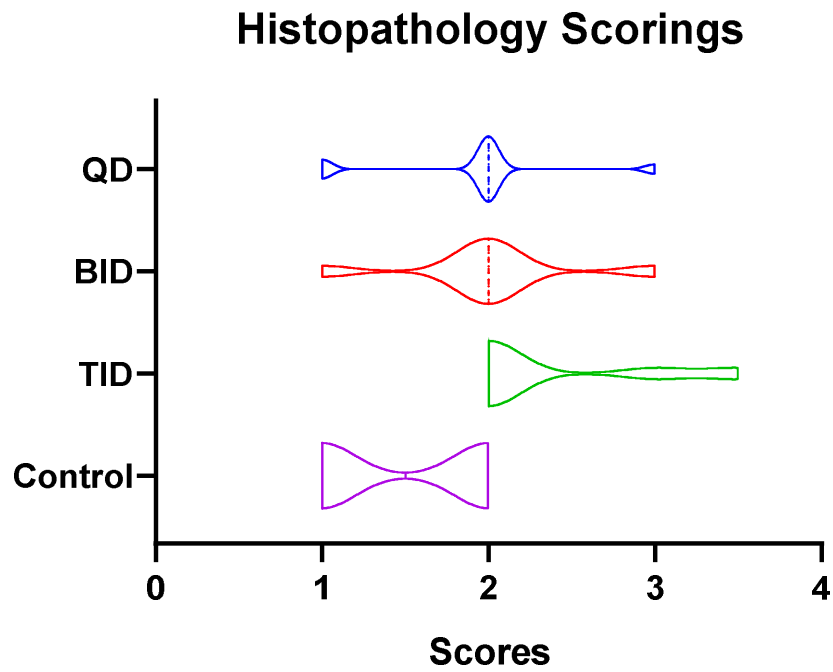

**Figure S2. QD group histopathological examination images**

**a) renal tubular regeneration (arrows) & vacuolation (arrowheads); score = 2**

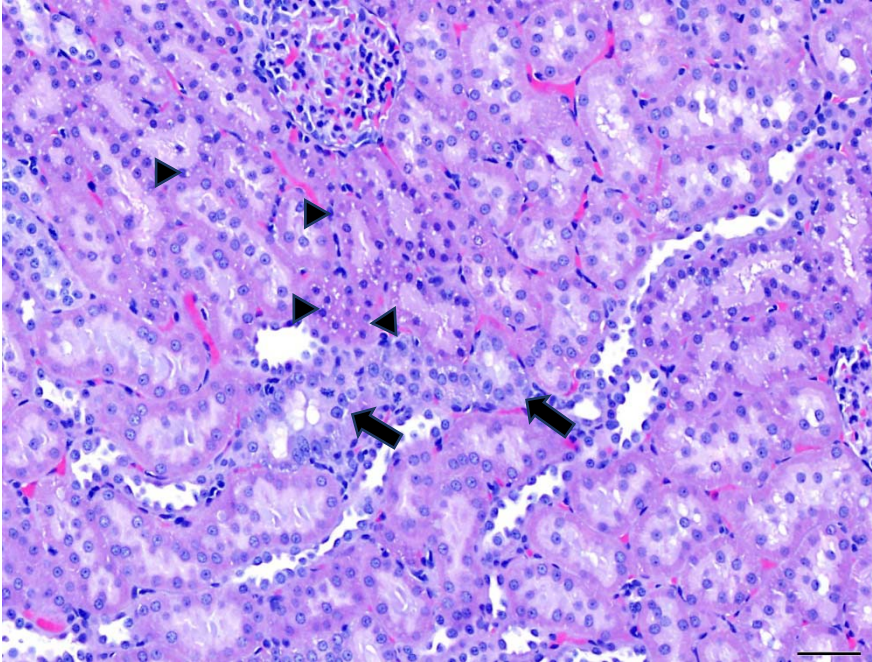

**b) renal tubular degeneration (arrows) and regeneration (arrowheads); score = 3**

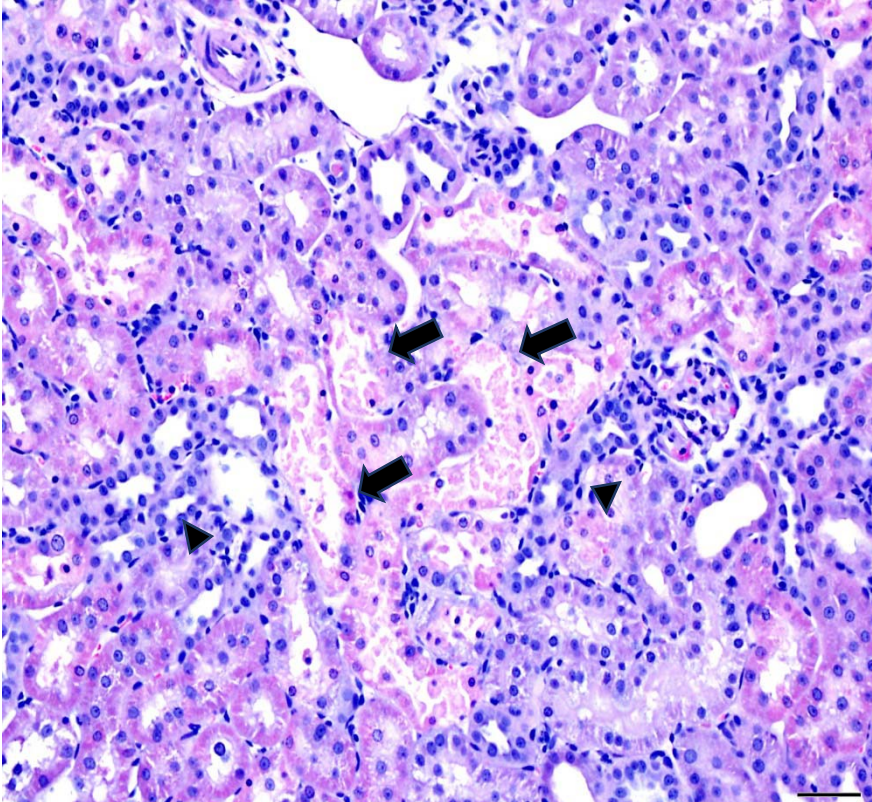

**Figure S3. BID group histopathological examination images**

**a) renal tubular regeneration (arrows) & dilatation (arrowheads); score = 2**

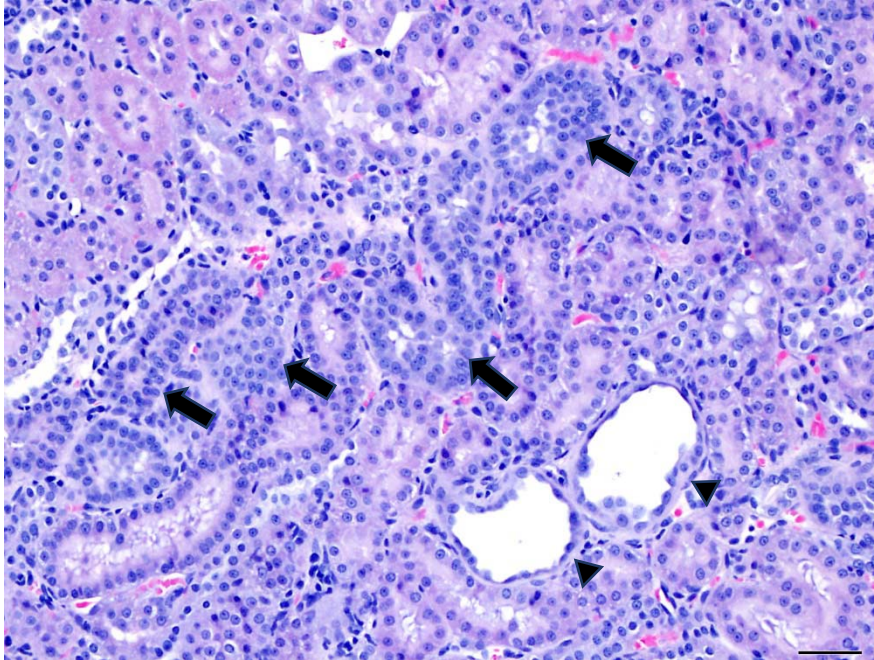

**b) renal tubular regeneration (arrows), cell sloughing (circle) & vacuolation (arrowheads); score = 3**

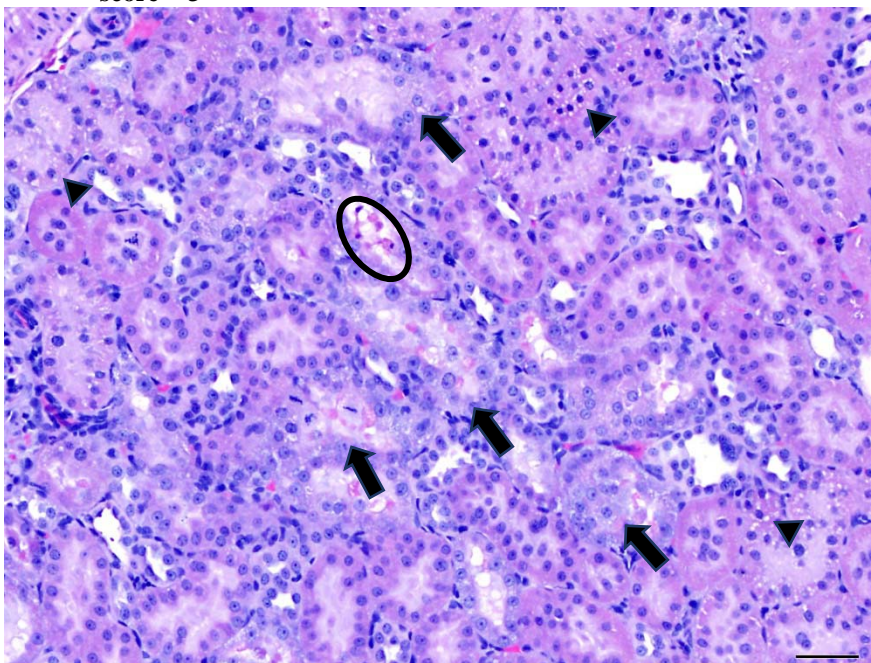

**Figure S4. TID group histopathological examination images: renal tubular regeneration (arrows) & vacuolation (arrowheads); score = 3**

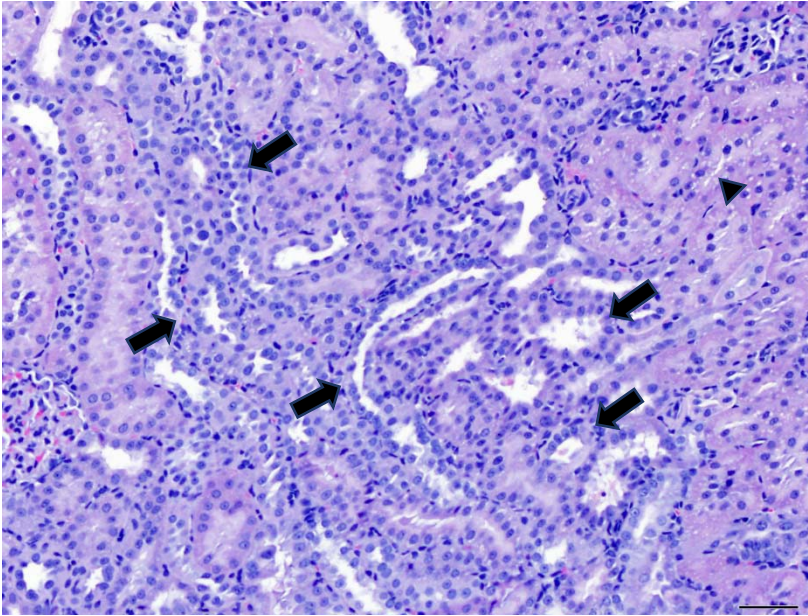

**Figure S5. Control group: renal tubular regeneration (arrows); score = 2**

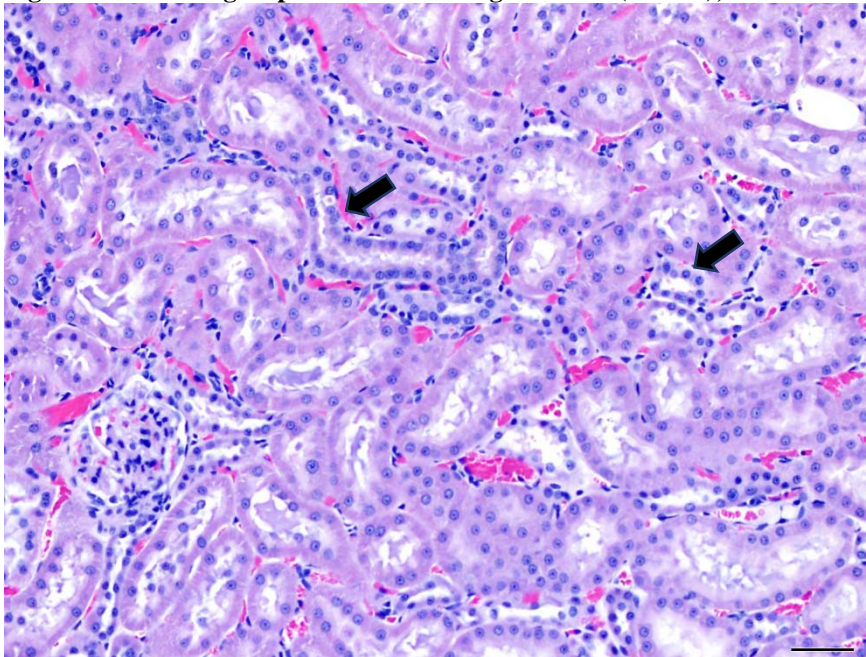

Source: http://biorxiv.org/content/10.1101/845024v1.full.pdf
